# Supplementary figures and images for: Dynamic Alteration Profile and New Role of RNA m6A Methylation in Replicative and H2O2-Induced Premature Senescence of Human Embryonic Lung Fibroblasts
Source: MDPI journal article supplement (doi:10.3390/ijms23169271), 2022-08-17

Supplementary Figure S1

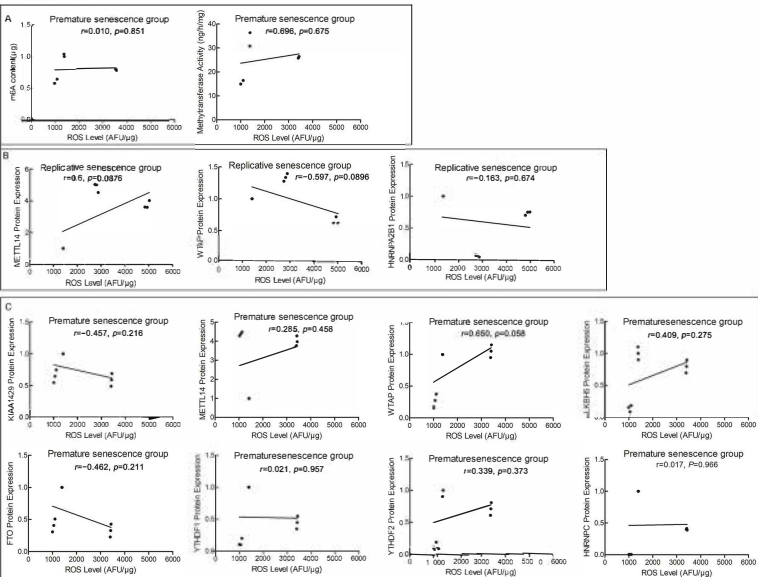

Supplement: s1 [file s1]
